# 1 Publication trend, impact and performance in mental 2 health during and post COVID-19 pandemic

3 Nurhidayah Bahar <sup>1,\*¶</sup>, Fadilla 'Atyka Nor Rashid <sup>2,¶</sup>, Nor Diana Ahmad <sup>3</sup>

4 <sup>1</sup> Center for Software Technology and Management, Universiti Kebangsaan Malaysia, Selangor, Malaysia

5 <sup>2</sup> Center for Artificial Intelligence Technology, Universiti Kebangsaan Malaysia, Selangor, Malaysia

6 <sup>3</sup> Faculty of Computer and Mathematical Sciences, Universiti Teknologi MARA, Shah Alam, Selangor, Malaysia

7 \* Corresponding author

8 Email: nbahar@ukm.edu.my

9 ¶ These authors contributed equally to this work.

## 10 Abstract

11 This study presents a bibliometric analysis of publications on mental health during and post-COVID-19 pandemic in  
12 Malaysia. The dataset comprises 167 documents retrieved from the Scopus database covering the period from 2020 to 2022.  
13 Using the open-source tool Bibliometrix for science mapping analysis, we examined various aspects of these publications,  
14 including document type, number of articles, total citations, most relevant sources, source impact, most relevant authors,  
15 affiliations, globally cited documents, and a word cloud. Our findings reveal a significant and continuous growth in mental  
16 health-related publications since the onset of the pandemic in 2020, highlighting an intensified focus on this critical area. This  
17 surge in research emphasizes the heightened importance of understanding and addressing mental health issues exacerbated by  
18 the pandemic. By providing a comprehensive summary of the bibliometric data, this study enhances our understanding of  
19 publication trends and the evolving landscape of mental health research, offering valuable insights for researchers,  
20 policymakers, and practitioners aiming to respond to mental health challenges in the post-pandemic era.

21 **Keywords:** Mental health, pandemic, COVID-19, bibliometric analysis, research patterns and trends, Bibliometrix

## 22 Introduction

23 Mental health can be regarded as a state of mental well-being that enables people to cope with the stresses of life,  
24 realize their abilities, learn well and work well, as well as contribute to their community [1]. Therefore, mental health is one of  
25 many fundamental human rights and it is important for the development of personal well-being, community and socio-  
26 economic. Mental health conditions include mental disorders, psychosocial disabilities and other mental states. Some of  
27 determinants that can make people more vulnerable to mental health problems are individual psychological and biological  
28 factors (i.e., emotional skills), substance use and genetics, in a state of unfavourable economic, social, and environmental  
29 circumstances (e.g., poverty, violence, and inequality) [1].

30 Mental disorder also referred to as a mental illness or psychiatric disorder refers to disturbance in an individual's  
31 thinking, emotional regulation, or behaviour. According to a report published by Global Health Data Exchange (GHDx) in  
32 2019, 970 million people around the world were living with a mental disorder, that is equivalent to 1 in every 8 people [2]. The  
33 number of people living with any sort of mental disorder rose significantly during COVID-19 pandemic in 2020. World Health  
34 Organization (WHO) in one of its articles estimated 26% and 28% increase respectively for anxiety and major depressive

35 disorders in just one year [3,4]. WHO also listed different types of mental disorders including anxiety disorders, depression,  
36 bipolar disorder, post-traumatic stress disorder (PTSD), schizophrenia, eating disorders, neurodevelopmental disorders,  
37 disruptive behaviour and dissocial disorders [3].

38 The literature review shows that there is a significant interest in investigating the implications of COVID-19 towards  
39 mental health. A closer look to the literature on mental health during and post COVID-19 pandemic in the Malaysian context,  
40 reveals a great number of studies have reported groups of people that psychological affected due to the global pandemic since  
41 its outbreak in late December 2019. Most of the earlier studies research the impact towards the well-being of healthcare workers  
42 [5–7] and their family members [8]. Healthcare workers play a vital role in management of the COVID-19 pandemic and often  
43 working longer hours to combat the outbreak. This caused a heavy-toll on their family members especially their children.

44 Psychological impact of COVID-19 were also observed among students at different levels such as primary and  
45 secondary school [9,10] as well as university students [11,12]. Apart from student population, researchers also extend the  
46 investigation to teachers [13], patients [14], parents [15] and elderly [16]. Motivated by this trend, present study aims to explore  
47 the current state of publication in mental health during and post COVID-19 pandemic. Particularly, the objectives of this study  
48 include (i) to examine the productivity of research through the publication trends and (ii) to evaluate its impact and performance  
49 using a few metrics such as the total citations, citations per paper, citations per year, number of cited papers, h-index, g-index  
50 and m-index.

## 51 **Methods**

52 This study employed bibliometric analysis to explore publication trend, impact and performance of studies relating to  
53 mental health during and post COVID-19 pandemic in Malaysia. Fig 1 shows the steps of how the dataset was obtained from  
54 the Scopus database on October 13, 2022.

### 55 **Fig 1. Steps undertaken to perform bibliometric analysis**

56 First, the keywords including other words that shared similar meanings to the topic were identified. For example,  
57 ‘mental health’, ‘covid’ and ‘pandemic’. Second, the academic database that has bibliographic information such as document  
58 title, authors, year, source, publication stage, and citation was chosen. This study chose to analyse bibliographic information  
59 from Scopus because it is one of the largest searchable citation and abstract literature search list [17].

60           Once the academic database was selected, the query was executed using suitable search strategy for Scopus. Fig 2  
61 shows the query used to search for relevant articles that is significant with the research area and the aim of the study. The query  
62 were searched within article title, abstracts and keywords revealed 167 document results. Next, screening was performed to  
63 ensure all of the documents are suitable to be included in the analysis. None of the document was removed and the final number  
64 of documents to be analysed remained 167.

#### 65 **Fig 2. The query**

66           The documents were published from 2020 to 2022 and derived from different Open Access types available  
67 in Scopus including Gold, Hybrid Gold, Bronze and Green. There were 160 documents that can be categorized as  
68 published article and another seven documents are article in press. This study used Bibliometrix, an R-tool to  
69 comprehensively perform the mapping analysis. Particularly, Biblioshiny was used to generate the visual  
70 presentation (e.g., list, graphs, tables, and word cloud) of the gathered data. This tool was widely used in many  
71 bibliometric analysis studies [18].

## 72 **Results**

73           A total of 167 documents were identified from the Scopus database published in three years; 2020 (61  
74 documents), 2021 (82 documents), and 2022 (24 documents). There were 13 types of documents published relevant  
75 to this topic including article (143 documents), review (9 documents), conference paper (7 documents), letter (5  
76 documents), editorial (2 documents), and book chapter (1 document). All of these documents were published in 98  
77 source titles including journals, conference proceeding, and book series involving 881 authors. A total of 5  
78 documents were single-authored publications while the remaining documents were multi-authored publications.  
79 Thus, Therefore, the degree of research collaboration for this subject is high (97%). The average co-authors per  
80 document is 6.45 and average citations per doc within the timespan (2020:2022) is 7.054. The percentage of  
81 international co-authorship is 38.32 percent. Fig 3 shows the three field plot consists of three parameters namely  
82 authors' country at the left field, authors at the middle field and authors' affiliation at the right field. This three field  
83 plot, however, depicts only twenty records for each parameter. This diagram helps to visualize the relationship  
84 between these three parameters.

85 **Fig 3. Three field plot**

## 86 **Growth of publications**

87 Growth of the publications was examined based on number of articles and total citations. Table 1 summarises the  
 88 details statistic of annual publications on the dataset including number of articles, mean total citations per article, mean total  
 89 citations per year and citable years. There is a growth of publication since 2020 and year 2022 with 59.43% of annual growth  
 90 rate. Year 2020 has the highest average value for both categories namely mean total citation per article (23.58) and mean total  
 91 citation per year (11.79).

92 **Table 1. Number of articles and total citations (TC)**

| Year | No. of Documents | Mean TC per Article | Mean TC per Year | Citable Years |
|------|------------------|---------------------|------------------|---------------|
| 2020 | 24               | 23.58               | 11.79            | 2             |
| 2021 | 82               | 6.89                | 6.89             | 1             |
| 2022 | 61               | 0.77                | -                | 0             |

93

## 94 **Relevant Sources and Source Impact**

95 The main three sources for this dataset are journal, review and conference. Table 2 present the title of top 10 relevant  
 96 sources that have published the documents related to mental health during and post COVID-19 pandemic from 2020 to 2022.  
 97 These source titles were ranked based on the number of publications related to the search area. This analysis shows the number  
 98 of articles being published, performance and impact that were measured based on four metrics including total publications  
 99 (TP), total citations (TC), h-index, g-index, and m-index. International Journal of Environmental Research and Public Health  
 100 has the highest number of publications (21 documents) and highest total citations (398). On the other hand, Frontiers in  
 101 Psychology has the least number of publications (3 documents) and lowest total citations.

102 **Table 2. Top 10 relevant sources**

| Sources                                                           | TP | TC  | h-index | g-index | m-index |
|-------------------------------------------------------------------|----|-----|---------|---------|---------|
| International Journal of Environmental Research and Public Health | 21 | 398 | 8       | 19      | 2.667   |
| Plos One                                                          | 11 | 237 | 5       | 11      | 2.500   |
| Frontiers in Public Health                                        | 5  | 1   | 1       | 1       | 0.500   |

|                                                   |   |    |   |   |       |
|---------------------------------------------------|---|----|---|---|-------|
| Malaysian Journal of Public Health Medicine       | 5 | 6  | 1 | 2 | 0.500 |
| Medical Journal of Malaysia                       | 5 | 10 | 2 | 3 | 0.333 |
| Sustainability                                    | 4 | 21 | 2 | 4 | 1.000 |
| Frontiers in Psychiatry                           | 3 | 30 | 1 | 3 | 0.500 |
| Frontiers in Psychology                           | 3 | 2  | 2 | 2 | 1.000 |
| Malaysian Journal of Medicine and Health Sciences | 3 | 5  | 1 | 2 | 0.500 |
| The Lancet Psychiatry                             | 3 | 7  | 2 | 2 | 1.000 |

103

## 104 Most Relevant Authors

105 Most relevant authors was analysed based on the number of articles produced by them and articles fractionalised as  
 106 shown in Table 3. This analysis quantifies the productivity of top 10 authors derived from this dataset. Nicholas Pang Tze Ping  
 107 from Universiti Malaysia Sabah (UMS) has the highest number of publications and positioned at the top of the list, followed  
 108 by Cheah Phee Kheng and Mohammad Saffree Jeffree with 6 articles. The results also show collaboration opportunities for  
 109 other researchers who wish to pursue studies in this area.

110 **Table 3. Top 10 most relevant authors**

| Authors                  | No. of Articles | Articles Fractionalized |
|--------------------------|-----------------|-------------------------|
| Nicholas Pang Tze Ping   | 8               | 1.10                    |
| Cheah Phee Kheng         | 6               | 0.34                    |
| Mohammad Saffree Jeffree | 6               | 0.65                    |
| Normala Ibrahim          | 5               | 0.78                    |
| Tin Tin Su               | 5               | 0.58                    |
| Walton Wider             | 5               | 0.67                    |
| Azizan Omar              | 4               | 0.34                    |
| Amaluddin Ahmad          | 3               | 0.25                    |
| Haridah Alias            | 3               | 0.71                    |
| Gul Muhammad Baloch      | 3               | 0.33                    |

111

## 112 Most Relevant Affiliations

113 The dataset was further analysed by examining the frequency of publications according to most relevant affiliations.  
 114 Most relevant affiliations refer to the productivity of publications based on the institutions where the authors claimed in the

115 publication [19]. Table 4 depicts the top 10 institutions that has contributed in publishing documents related to mental health  
116 studies during and post COVID-19 pandemic. Universiti Sains Malaysia is at the top of the list (34 articles), followed by  
117 Universiti Kebangsaan Malaysia and Universiti Malaya (26 articles). The rest of institutions have published less than 20 articles  
118 from 2020 to 2022 such as Universiti Teknologi MARA, Universiti Malaysia Sabah, Universiti Putra Malaysia to name but a  
119 few.

120 **Table 4. Top 10 most relevant affiliations**

| Affiliation                     | Articles |
|---------------------------------|----------|
| Universiti Sains Malaysia       | 34       |
| Universiti Kebangsaan Malaysia  | 26       |
| Universiti Malaya               | 26       |
| Universiti Teknologi MARA       | 16       |
| Universiti Malaysia Sabah       | 16       |
| Kementerian Kesihatan Malaysia  | 14       |
| Universiti Putra Malaysia       | 14       |
| Universiti Malaysia Sarawak     | 9        |
| Universiti Tunku Abdul Rahman   | 8        |
| Universiti Sultan Zainal Abidin | 8        |
| Monash University Malaysia      | 7        |

121

## 122 **Most Global Cited Documents**

123 Most global cited documents was calculated based on the number of citations received by the particular document as  
124 of the search was undertaken from all the documents around the world [19]. The citations were count based on all articles  
125 within the Scopus database that cite the paper. These most global cited documents were measured by total citations (TC), total  
126 citations per year and normalized TC (NTC) as tabulated in Table 5. Document by Sheela Sundarasan et al. [20] entitled  
127 “Psychological Impact of COVID-19 and Lockdown among University Students in Malaysia: Implications and Policy  
128 Recommendations” received the highest number of citations, followed by article entitled “The impact of COVID-19 pandemic  
129 on physical and mental health of Asians: A study of seven middle-income countries in Asia” written by Cuiyan Wang et al. in  
130 2021.

131 **Table 5. Most global cited documents**

| Paper                                               | DOI                          | TC  | TC per Year | NTC   |
|-----------------------------------------------------|------------------------------|-----|-------------|-------|
| Sundarasan S, 2020, Int J Environ Res Public Health | 10.3390/ijerph17176206       | 211 | 70.33       | 8.95  |
| Wang C, 2021, Plos One                              | 10.1371/journal.pone.0246824 | 167 | 83.50       | 24.24 |
| Elengoe A, 2020, Osong Public Health Res Perspect   | 10.24171/j.phrp.2020.11.3.08 | 99  | 33.00       | 4.20  |
| Woon Lsc, 2020, Int J Environ Res Public Health     | 10.3390/ijerph17249155       | 41  | 13.67       | 1.74  |
| Yau Ekb, 2020, Malays J Med Sci                     | 10.21315/mjms2020.27.2.5     | 40  | 13.33       | 1.70  |
| Fauzi Mfm, 2020, Int J Environ Res Public Health    | 10.3390/ijerph17197340       | 31  | 10.33       | 1.31  |
| Wong Lp, 2021, Plos One                             | 10.1371/journal.pone.0248916 | 29  | 14.50       | 4.21  |
| Wan Mohd Yunus Wma, 2021, Front Psychiatry          | 10.3389/fpsy.2020.566221     | 29  | 14.50       | 4.21  |
| Dai H, 2020, Int J Environ Res Public Health        | 10.3390/ijerph17155498       | 24  | 8.00        | 1.02  |
| Du C, 2021, Nutrients                               | 10.3390/nu13020442           | 23  | 11.50       | 3.34  |

132

## 133 **Keyword and Word Cloud**

134 There are several important keywords used in this dataset. The highest number of keyword used is COVID-19 or some  
 135 documents might also use Coronavirus Disease 2019. Some other keywords that frequently used in the dataset are  
 136 human/humans, pandemic, mental health, female and adult. This list of keyword was directly retrieved from Scopus.  
 137 Alternatively, word cloud was generated to examine word frequency in the entire dataset. Fig 4 is a graphical representation of  
 138 word frequency that emphasises words that frequently appeared in the dataset. This visual representation gives greater rank to  
 139 words that appear more frequently. From this figure it can be seen there are a few words were highlighted such as depression  
 140 (95 occurrences), pandemic (94 occurrences), female (93 occurrences), male (85 occurrences), and anxiety (74 occurrences).  
 141 This is consistent with the keywords listed by Scopus.

142 **Fig 4. Word cloud of authors' keywords**

## 143 **Discussion**

144 The first cases of COVID-19 in Malaysia were reported in late January 2020. In March 2020, the Malaysian  
 145 government imposed the Movement Control Order (MCO), which included restrictions on movement, and the closure of non-



146 essential businesses and schools. Subsequently, MCOs were implemented in various forms (e.g., Conditional MCO, Enhanced  
147 MCO) based on the severity of outbreaks. Public health interventions such as mask mandates, social distancing, travel  
148 restrictions, and testing protocols were enforced throughout the period. The COVID-19 pandemic had a profound impact on  
149 mental health in Malaysia. Factors contributing to mental health challenges included social isolation and loneliness due to  
150 lockdowns and movement restrictions [21], uncertainty and anxiety about the virus and health [22], economic stress from job  
151 losses and reduced income as well as grief and trauma from illness and deaths within communities [23].

152         Given the significant mental health challenges faced during this period, it is crucial to understand the corresponding  
153 research trends. To answer the research question (What is the current state of publication in mental health during and post  
154 COVID-19 pandemic?), this study examined the publication trend by analysing the bibliographic data collected including  
155 document type, number of articles and total citations, most relevant sources, source impact, most relevant authors, most relevant  
156 affiliation, most global cited documents, and the word cloud. The selection of articles between the year 2020 until 2022 in this  
157 bibliometric analysis is significant to further understand the publication trend, impact and performance in mental health during  
158 and post COVID-19 pandemic. The findings suggest that there is a significant growth of publication for studies relating to  
159 mental health especially during and post pandemic.

160         The studies involved individuals with diverse profiling such as students[12,24], teachers[25], parents[15], and  
161 healthcare workers[26]. It is evident that the findings from these studies are deemed important highlighting well-being mental  
162 health among Malaysian during pandemic period. Most of the studies were conducted during the early stage of COVID-19  
163 pandemic in Malaysia, thus, the findings reported in this studies shed light on the issues involved within this area. For instance,  
164 researchers developed a tool to measure mental health conditions among Malaysians [24], determined the distress symptoms  
165 and the coping strategies among medical students [12] as well as investigated the prevalence and severity of depression, anxiety,  
166 and stress healthcare workers during the covid-19 pandemic [5].

167         The rise in the number of publications on mental health in 2021 can be attributed to several factors directly related to  
168 the evolving COVID-19 situation. As the pandemic progressed into its second year, the cumulative effects of prolonged social  
169 isolation, economic uncertainty, and health-related anxiety became more pronounced. Researchers and healthcare professionals  
170 increasingly recognized the urgent need to understand and address the mental health crisis derived from these conditions. The  
171 acceleration of vaccination programs in early 2021 also played a role. As vaccines became widely available and public health

172 measures evolved, researchers began to focus on the mental health implications of vaccination, vaccine hesitancy, and the  
173 transition to a new normal[27–30].

## 174 **Conclusion**

175 This study aims to extract meaningful information about the structures of publication trend in mental health  
176 during and post-pandemic from the Scopus database. It is clear that there is positive growth of scientific publications in  
177 this topic since 2020. The findings from this study provide several contributions. First, the output from the bibliometric  
178 analysis could help to evaluate the journals that are desirable for the research committee to publish/subscribe. Second,  
179 the results provide insights relating to trend, performance and the state of the art of publication within the field of present  
180 study. Third, this study would benefit policymaker or funding sponsor for deciding allocation of the fund, developing  
181 research guidelines and interest, and strategizing the national agenda based on the report that shows ranking of education  
182 institutions and the profiling of the researchers' productivities and impact. More importantly, the present study help other  
183 researchers to understand the global issue regarding mental health and propose pathways for further studies. The growing  
184 mental health problem has significantly affected people worldwide, including in Malaysia. Thus, there is an urgent need  
185 for effective interventions and robust policies, involving key players such as healthcare providers, policymakers, and  
186 community organizations, to manage mental health disorders among the population.

187 There are a few limitations to this bibliometric study. First, the data presented in this study are derived solely  
188 from the Scopus database and were collected using specific keywords. While Scopus provides a comprehensive source  
189 of academic literature, reliance on a single database and the use of specific keywords may have constrained the breadth  
190 and depth of the analysis. Alternative databases and additional or broader keywords could potentially yield different  
191 results and perspectives, thereby enhancing the comprehensiveness of future studies on this topic. Second, the analysis  
192 is limited to bibliographical information. Further analysis can be conducted to examine the collaborations networks within  
193 the reference clusters and relationships, scientific communities, research themes and evolution of keywords or terms, and  
194 research gaps. Future research in this field could explore several promising directions. Firstly, investigating collaboration  
195 networks among researchers in mental health during and post-COVID-19 could provide insights into interdisciplinary  
196 approaches and effective knowledge dissemination strategies. Additionally, identifying research gaps within specific

197 subfields of mental health, such as interventions for vulnerable populations or the impact of socioeconomic factors, could  
198 guide targeted research efforts and policy initiatives. Furthermore, analyzing the evolution of research themes over time,  
199 particularly in relation to emerging global health crises or shifts in public health policies, could offer valuable perspectives  
200 on the dynamic nature of mental health research. These future directions not only expand upon the current findings but  
201 also contribute to enhancing our understanding and addressing the complex challenges posed by mental health in a post-  
202 pandemic world.

## 203 Acknowledgements

204 Do not include funding or competing interests information in Acknowledgments.

## 205 References

- 206 1. Mental health: strengthening our response. In: World Health Organization [Internet]. 2022 [cited 19 Oct  
207 2022]. Available: [https://www.who.int/news-room/fact-sheets/detail/mental-health-strengthening-our-](https://www.who.int/news-room/fact-sheets/detail/mental-health-strengthening-our-response)  
208 response.
- 209 2. Global Health Data Exchange (GHDx). In: Institute of Health Metrics and Evaluation [Internet]. 2019 [cited  
210 19 Oct 2022]. Available: <https://vizhub.healthdata.org/gbd-results/>
- 211 3. Mental disorders. In: World Health Organization [Internet]. 2022 [cited 19 Oct 2022]. Available:  
212 <https://www.who.int/news-room/fact-sheets/detail/mental-disorders>.
- 213 4. Mental Health and COVID-19: Early evidence of the pandemic's impact: Scientific brief. . In: World Health  
214 Organization. Mental [Internet]. 2022 [cited 19 Oct 2022]. Available:  
215 [https://www.who.int/publications/i/item/WHO-2019-nCoV-Sci\\_Brief-Mental\\_health-2022](https://www.who.int/publications/i/item/WHO-2019-nCoV-Sci_Brief-Mental_health-2022).
- 216 5. Woon L, Sidi H, Nik Jaafar NR, Leong Bin Abdullah M. Mental Health Status of University Healthcare  
217 Workers During the COVID-19 Pandemic: A Post-Movement Lockdown Assessment. *Int J Environ Res Public*  
218 *Health*. 2020;17. doi:10.20944/preprints202011.0422.v1
- 219 6. Mohd Fauzi MF, Mohd Yusoff H, Robat R, Mat Saruan N, Ismail K, Haris A. Doctors' Mental Health in the  
220 Midst of COVID-19 Pandemic: The Roles of Work Demands and Recovery Experiences. *Int J Environ Res*  
221 *Public Health*. 2020;17: 7340. doi:10.3390/ijerph17197340
- 222 7. Voon K, Premnath N. How do surgeons weather the storm of COVID-19 pandemic? *Med J Malaysia*.  
223 2020;75: 762–763.
- 224 8. Tang S, Azmi A. Let us not forget the children of front liners in COVID-19. *Med J Malaysia*. 2020;75: 587.
- 225 9. Thandevaraj EJ, Gani NAN, Nasir MKM. A review of psychological impact on students online learning during  
226 covid-19 in malaysia. *Creat Educ*. 2021;12: 1296–1306.

- 227 10. Loganathan Tharani AND Chan ZXANDHFANDKWANDSRANDYHANDMHA. Education for non-citizen  
228 children in Malaysia during the COVID-19 pandemic: A qualitative study. PLoS One. 2021;16: 1–19.  
229 doi:10.1371/journal.pone.0259546
- 230 11. Mukhsam M, Jeffree M, Pang N, Syed Abdul Rahim SS, Omar A, Abdullah M, et al. A University-Wide  
231 Preparedness Effort in the Alert Phase of COVID-19 Incorporating Community Mental Health and Task-  
232 Shifting Strategies: Experience from a Bornean Institute of Higher Learning. Am J Trop Med Hyg. 2020;103.  
233 doi:10.4269/ajtmh.20-0458
- 234 12. Mohamed S, Ismail Z, Shuib N, Ali N. Peri-Traumatic Distress and Its Relationship to Resilience and Coping  
235 Among Medical Students in Malaysia During COVID-19 Lockdown. Front Psychiatry. 2021;12: 789554.  
236 doi:10.3389/fpsy.2021.789554
- 237 13. Guoyan S, Khaskheli A, Raza SA, Khan K, Hakim F. Teachers' self-efficacy, mental well-being and  
238 continuance commitment of using learning management system during COVID-19 pandemic: a  
239 comparative study of Pakistan and Malaysia. Interactive Learning Environments. 2021;31: 1–23.  
240 doi:10.1080/10494820.2021.1978503
- 241 14. Othman E, Mohamad M, Giampietro V. Patient satisfaction with teleconsultation during COVID-19  
242 pandemic: a descriptive study for mental health care in Malaysia. Malaysian Journal of Public Health  
243 Medicine. 2021;21: 243–251. doi:10.37268/mjphm/vol.21/no.2/art.971
- 244 15. Masiran R, Ibrahim N, Awang H, Poh Ying L, Tze Lin C, Ganesh Narayanasamy S. Effectiveness of the  
245 Incredible Years parenting program for children with behavioral problems: An experience in a developing  
246 country during a pandemic. Child Youth Serv Rev. 2022;142: 106629.  
247 doi:<https://doi.org/10.1016/j.chilyouth.2022.106629>
- 248 16. Maung TM, Tan SY, Tay CL, Kabir MS, Shirin L, Chia TY. Mental Health Screening during COVID-19 Pandemic  
249 among School Teachers in Malaysia: A Cross-Sectional Study. Sustainability. 2022;14.  
250 doi:10.3390/su141710664
- 251 17. Ahmi A, Elbardan H, Raja Mohd Ali RH. Bibliometric Analysis of Published Literature on Industry 4.0. 2019  
252 International Conference on Electronics, Information, and Communication (ICEIC). 2019. pp. 1–6.  
253 doi:10.23919/ELINFOCOM.2019.8706445
- 254 18. Secundo G, Ndou V, Vecchio P Del, De Pascale G. Sustainable development, intellectual capital and  
255 technology policies: A structured literature review and future research agenda. Technol Forecast Soc  
256 Change. 2020;153: 119917. doi:<https://doi.org/10.1016/j.techfore.2020.119917>
- 257 19. Ahmi A. Bibliometric Analysis using R for Non-Coders: A practical handbook in conducting bibliometric  
258 analysis studies using Biblioshiny for Bibliometrix R package. Preprint Edition. 2022.
- 259 20. Sundarasan S, Chinna K, Kamaludin K, Nurunnabi M, Baloch G, Khoshaim H, et al. Psychological Impact of  
260 COVID-19 and Lockdown among University Students in Malaysia: Implications and Policy  
261 Recommendations. Int J Environ Res Public Health. 2020;17: 6206. doi:10.3390/ijerph17176206
- 262 21. Beckstein A, Rathakrishnan B, Hutchings P, Mohamed N. THE COVID-19 PANDEMIC AND MENTAL HEALTH  
263 IN MALAYSIA: CURRENT TREATMENT AND FUTURE RECOMMENDATIONS. Malaysian Journal of Public  
264 Health Medicine. 2021;21: 260–267. doi:10.37268/mjphm/vol.21/no.1/art.826

- 265 22. Marzo R, Vinay V, Bahari R, Chauhan S, Ming D, Fernandez S, et al. Depression and anxiety in Malaysian  
266 population during third wave of the COVID-19 pandemic. *Clin Epidemiol Glob Health*. 2021;12: 100868.  
267 doi:10.1016/j.cegh.2021.100868
- 268 23. Shanmugam H, Juhari JA, Nair P, Ken CS, Guan NC. Impacts of COVID-19 Pandemic on Mental Health in  
269 Malaysia: A Single Thread of Hope. *The Malaysian Journal of Psychiatry*. 2020;29: 78–84. Available:  
270 <https://api.semanticscholar.org/CorpusID:219093060>
- 271 24. Thiyagarajan A, James TG, Marzo RR. Psychometric properties of the 21-item Depression, Anxiety, and  
272 Stress Scale (DASS-21) among Malaysians during COVID-19: a methodological study. *Humanit Soc Sci*  
273 *Commun*. 2022;9: 220. doi:10.1057/s41599-022-01229-x
- 274 25. Maung TM, Jain T, Madhanagopal J, Naidu SRLR, Phyu HP, Oo WM. Impact of Aerobic and Strengthening  
275 Exercise on Quality of Life (QOL), Mental Health and Physical Performance of Elderly People Residing at  
276 Old Age Homes. *Sustainability*. 2022;14. doi:10.3390/su141710881
- 277 26. Ping Lei C, Chong M, Khatijah LA, Ramoo V, Tang L, Wan Ling L, et al. The COVID-19 Global Pandemic and  
278 Its Impact on the Mental Health of Nurses in Malaysia. *Healthcare*. 2021;9: 1259.  
279 doi:10.3390/healthcare9101259
- 280 27. Syed Alwi SAR, Rafidah E, Zurraini A, Juslina O, Brohi IB, Lukas S. A survey on COVID-19 vaccine acceptance  
281 and concern among Malaysians. *BMC Public Health*. 2021;21: 1129. doi:10.1186/s12889-021-11071-6
- 282 28. Jayasundara P, Peariasamy KM, Law KB, Abd Rahim KNK, Lee SW, Ghazali IMM, et al. Sustaining effective  
283 COVID-19 control in Malaysia through large-scale vaccination. *Epidemics*. 2021;37: 100517.  
284 doi:<https://doi.org/10.1016/j.epidem.2021.100517>
- 285 29. Lau Fei Wen J, Woon Y, Leong CT, Teh H. Factors influencing acceptance of the COVID-19 vaccine in  
286 Malaysia: a web-based survey. *Osong Public Health Res Perspect*. 2021;12. doi:10.24171/j.phrp.2021.0085
- 287 30. Wong WKO, Juwono FH, Chua TH. SIR Simulation of COVID-19 Pandemic in Malaysia: Will the Vaccination  
288 Program be Effective? 2021. Available: <https://api.semanticscholar.org/CorpusID:231639181>
- 289

Identifying the keywords and search string

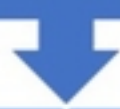

Selecting academic database

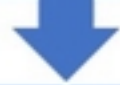

Executing the query

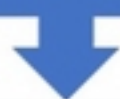

Screening the results

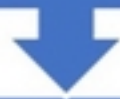

Exporting the results

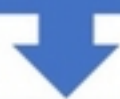

Analysing the results

**(TITLE-ABS-KEY(mental health and covid or pandemic and  
malaysia))**



AU\_CO

AU

AU\_UN

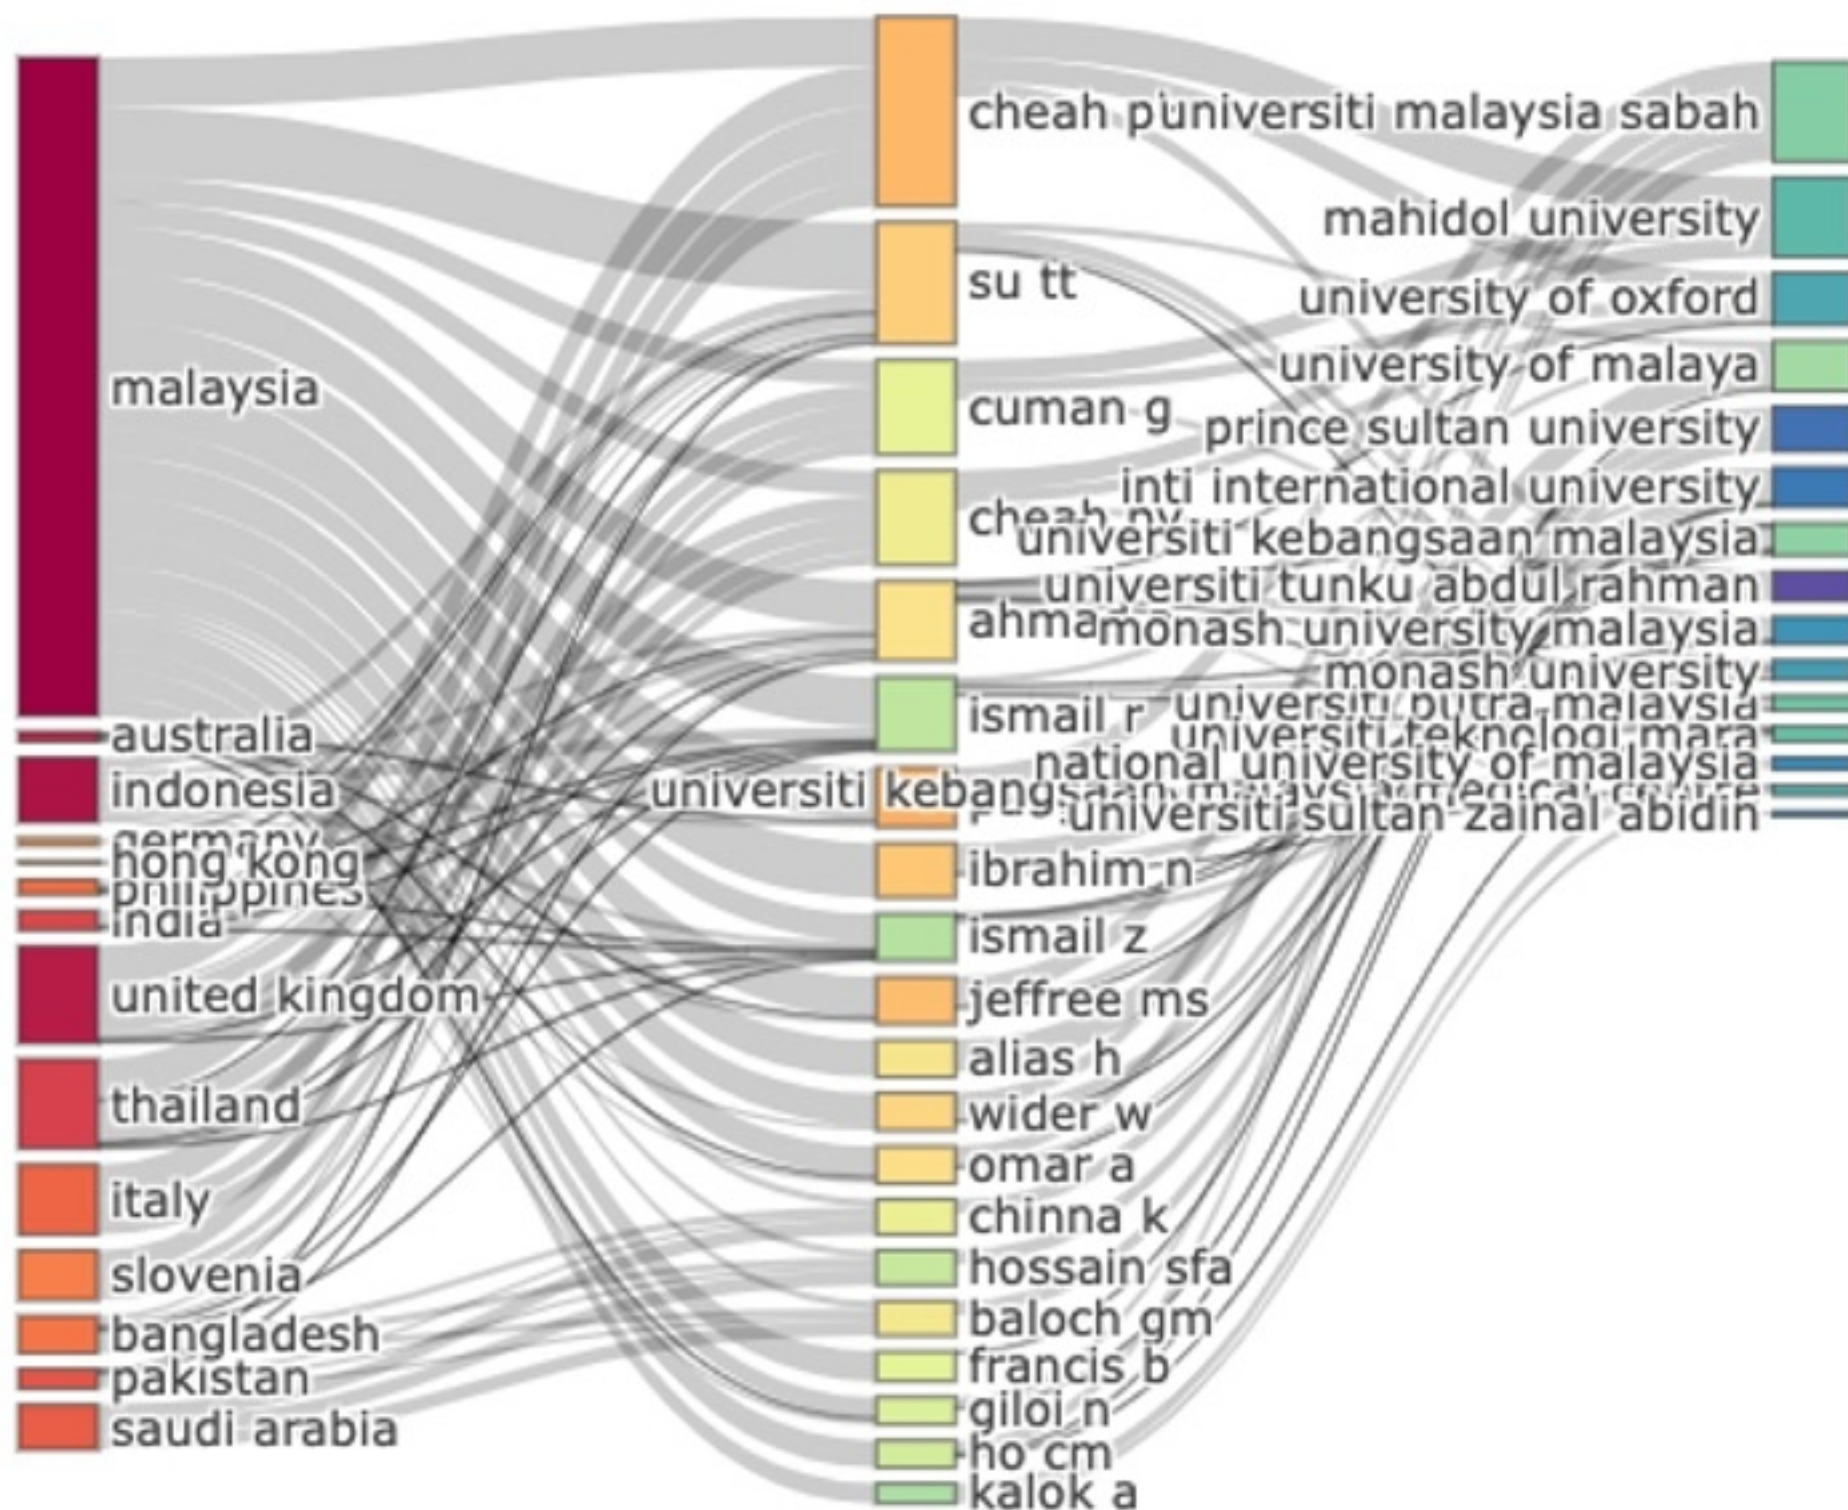



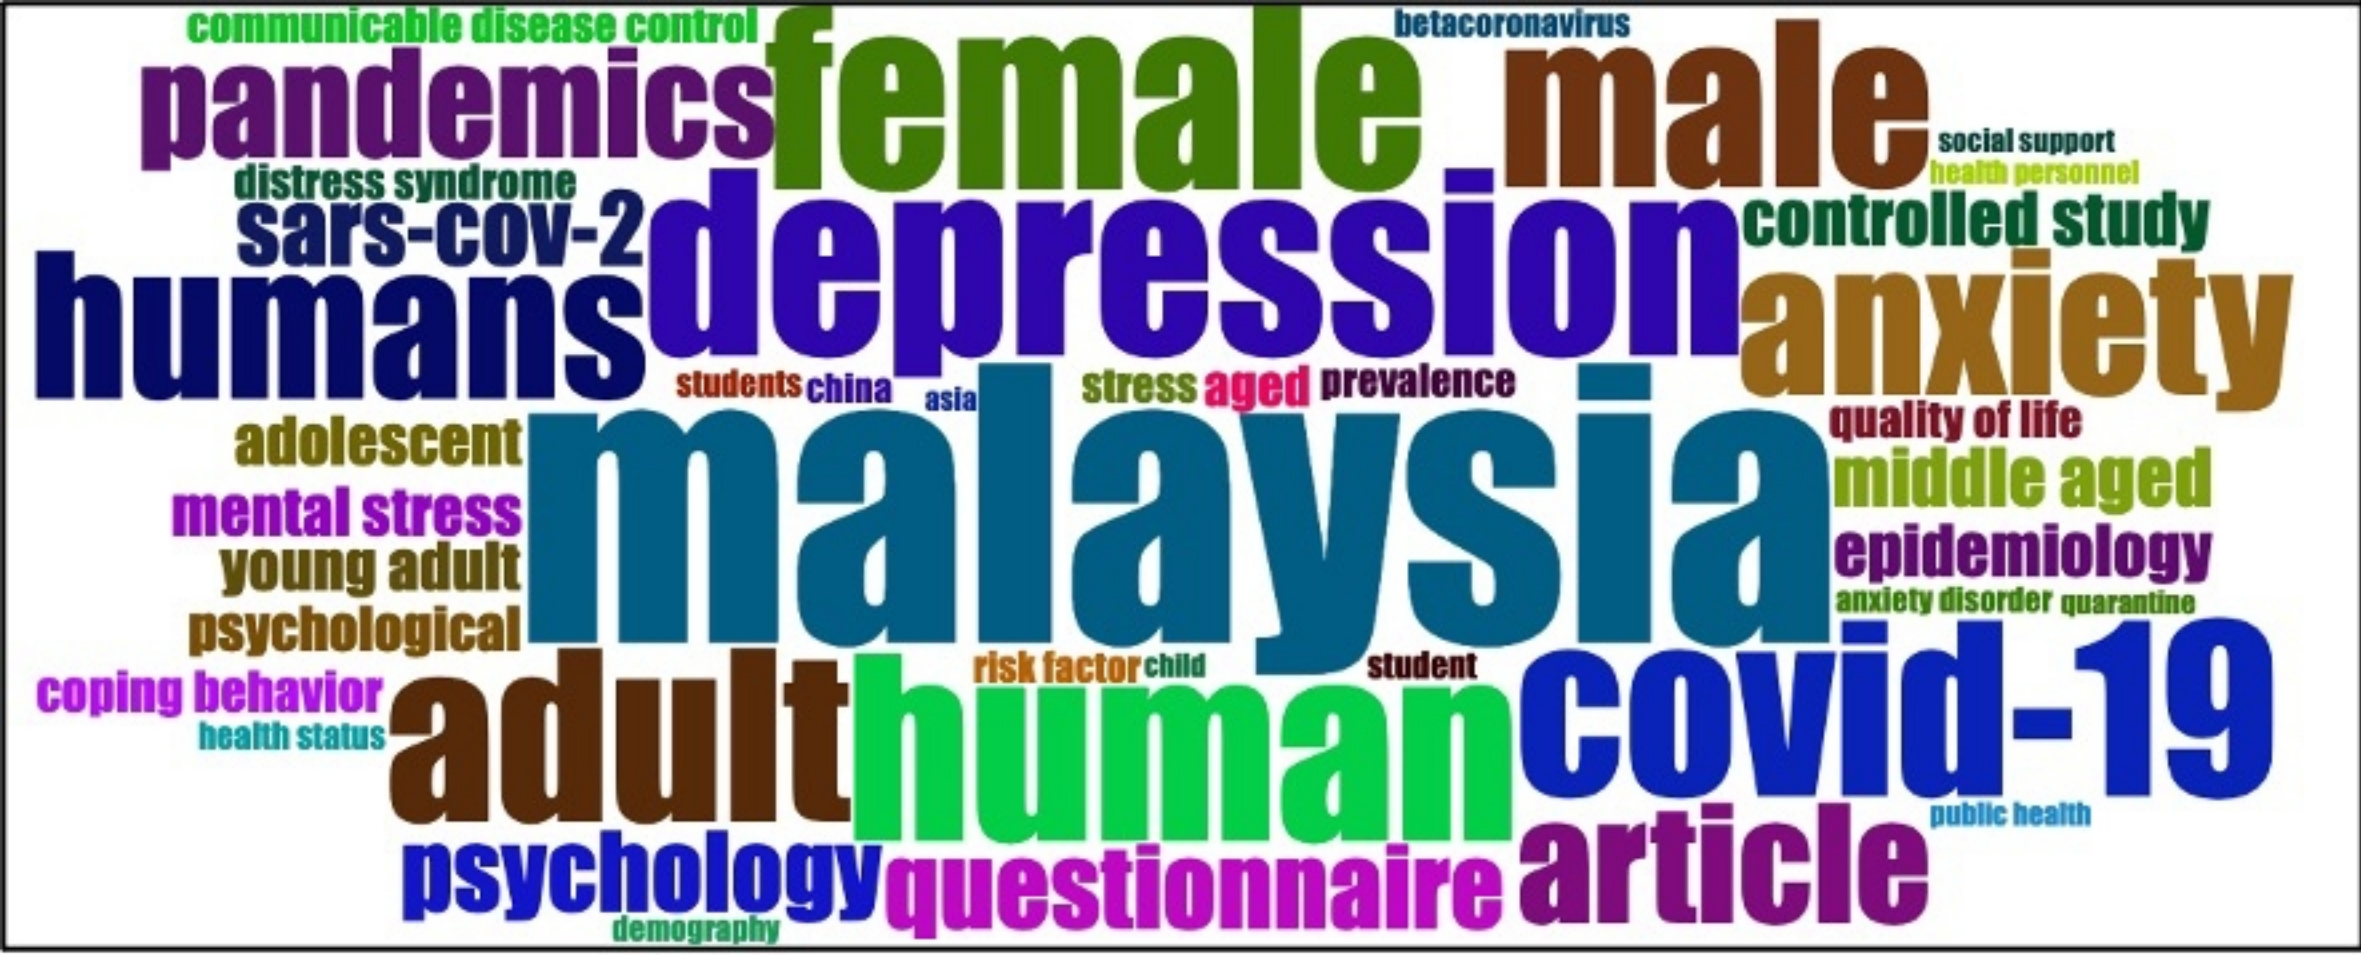

Source: https://medrxiv.org/content/10.1101/2024.07.04.24309983.full.pdf
